# Supplementary material for: Fuzzy modeling reveals a dynamic self-sustaining network of the GLI transcription factors controlling important metabolic regulators in adult mouse hepatocytes
Source: Royal Society of Chemistry journal article supplement (doi:10.1039/c5mb00129c), 2015-05-14
Supplement: c5mb00129c1.pdf [file c5mb00129c1.pdf]

## Additional file 1

### Supporting information Tables

**Table S1:** Primers for qRT-PCR analyses.

| <b>Gene</b>       | <b>Sequence</b>                                                   |
|-------------------|-------------------------------------------------------------------|
| <i>beta Actin</i> | forward catccgtaaagacctctatgccaac<br>reverse atggagccaccgatccaca  |
| <i>Ccnd1</i>      | forward gagaccattcccttgactgc<br>reverse tggctgctgttctcatcc        |
| <i>Cdo</i>        | forward gattctgtgctggggtgaa<br>reverse cagtgggagtcctgtgat         |
| <i>Dkk1</i>       | forward gaggggaaattgaggaaagc<br>reverse ggtgcacacctgaccttct       |
| <i>Gata4</i>      | forward ggaagacacccaatctcg<br>reverse catggccccacaattgac          |
| <i>Gata6</i>      | forward ggtctctacagcaagatgaatgg<br>reverse tggcacaggacagtccaag    |
| <i>Gli1</i>       | <a href="#">Mm_Gli1_1_SG QuantiTect Primer Assay (QT00173537)</a> |
| <i>Gli2</i>       | <a href="#">Mm_Gli2_2_SG QuantiTect Primer Assay (QT01062236)</a> |
| <i>Gli3</i>       | <a href="#">Mm_Gli3_1_SG QuantiTect Primer Assay (QT00102256)</a> |
| <i>Ppar-α</i>     | forward cgtacggcaatggctttatc<br>reverse tcatctggatggttgctctg      |
| <i>Ppar-γ</i>     | forward atggaagaccactcgcattc<br>reverse gctttatccccacagactcg      |
| <i>Smo</i>        | forward gcaagctcgtgctctggt<br>reverse gggcatgtagacagcacaca        |
| <i>Srebp1</i>     | forward aagcgctaccggcttctatc<br>reverse tgtgcacttcgtagggctcag     |
| <i>Srebp2</i>     | forward agccctaccgtacacacc<br>reverse gatggcagtagctcgctctc        |
| <i>Stat1</i>      | forward tgagatgtcccggatagtgg<br>reverse cgccagagagaaattcgtgt      |
| <i>Stat3</i>      | forward gttcctggcaccttgatt<br>reverse caacgtggcatgtgactctt        |
| <i>Wnt5a</i>      | forward caaataggcagccgagagac<br>reverse ctctagcgtcctcgaactcc      |

Primer for quantitative real time PCR analyses.

**Table S2:** Primers for RNA interference experiments.

| <b>Gene</b> | <b>Sequence</b>                                        |
|-------------|--------------------------------------------------------|
| Gli1        | CCCAACAUGGCAGUGGGUAACAUGA<br>UCAUGUUACCCACUGCCAUGUUGGG |
| Gli2        | CCACAACCACAACGUUGCUCAGACA<br>UGUCUGAGCAAGCUUGUGGUUGUGG |
| Gli3        | UAGCAAGGCCAUCUUGGUCUUCAGG<br>CCUGAAGACCAAGAUGGCCUUGCUA |
| Ptch2       | UCCUGGGCAUCAAACUGAGUGCCAU<br>AUGGCACUCAGUUUGAUGCCCAGGA |
| Sufu        | CCCUUGGACUAUGUUAGCAUGUACA<br>UGUACAUGCUAACAUGUCCAAGGG  |

Primer for siRNA knockdown experiments in cultivated hepatocytes.
